# Supplementary material
Source: publisher figshare collection journal article supplement (https://karger.figshare.com/ndownloader/files/14312570)

## **Supplementary Materials**

**Table S1.** Exclusion of extreme small facilities in profiling analysis: (a) Facilities with raw readmission rate (RRR) of exactly 1 (due to having only several patients) and (b) Facilities with less than 10 discharges.

| Year | # Facilities before exclusion | (a) # facilities with RRR=1 | # Patients in (a) RRR=1 [min, max] | (b) # facilities with < 10 discharges | # Patients in (b) [min, max] | Total facilities in (a) or (b) | # facilities after exclusion |
|------|-------------------------------|-----------------------------|------------------------------------|---------------------------------------|------------------------------|--------------------------------|------------------------------|
| 2010 | 6364                          | 94                          | [1, 4]                             | 1017                                  | [1, 9]                       | 1018                           | 5346                         |
| 2011 | 6750                          | 117                         | [1, 2]                             | 1168                                  | [1, 8]                       | 1171                           | 5579                         |
| 2012 | 6919                          | 107                         | [1, 2]                             | 1282                                  | [1, 9]                       | 1282                           | 5637                         |
| 2013 | 7121                          | 108                         | [1, 3]                             | 1492                                  | [1, 9]                       | 1493                           | 5628                         |

**Table S2.** Agency for Healthcare Research and Quality (AHRQ) Clinical Classification System (CCS) procedure/condition category: (A) Planned procedure list, (C) Discharge condition categories considered acute or complications of care, and (C) Condition categories for high risk discharge.

|                                                                                                                                                                                                                                                                                                                                                                                                                                                                                                                                                                                                                                                                                                                                                                                                                                                                                                                                                                                                                                                                                                                                                                                                                                                                                                                                                                                                      |
|------------------------------------------------------------------------------------------------------------------------------------------------------------------------------------------------------------------------------------------------------------------------------------------------------------------------------------------------------------------------------------------------------------------------------------------------------------------------------------------------------------------------------------------------------------------------------------------------------------------------------------------------------------------------------------------------------------------------------------------------------------------------------------------------------------------------------------------------------------------------------------------------------------------------------------------------------------------------------------------------------------------------------------------------------------------------------------------------------------------------------------------------------------------------------------------------------------------------------------------------------------------------------------------------------------------------------------------------------------------------------------------------------|
| <b>(A) AHRQ Procedure CC : Procedure</b>                                                                                                                                                                                                                                                                                                                                                                                                                                                                                                                                                                                                                                                                                                                                                                                                                                                                                                                                                                                                                                                                                                                                                                                                                                                                                                                                                             |
| 45 : Percutaneous transluminal coronary angioplasty (PTCA); 84 : Cholecystectomy and common duct exploration; Condition CCS 45 : Maintenance chemotherapy; 157 : Amputation of lower extremity; 51 : Endarterectomy, vessel of head and neck; 78 : Colorectal resection; 44 : Coronary artery bypass graft (CABG); 152 : Arthroplasty knee; 113 : Transurethral resection of prostate (TURP); 153 : Hip replacement, total and partial; 211 : Therapeutic radiology for cancer treatment; 158 : Spinal fusion; 48 : Insertion, revision, replacement, removal of cardiac pacemaker or cardioverter/defibrillator; 3 : Laminectomy; excision intervertebral disc; 36 : Lobectomy or pneumonectomy; 55 : Peripheral vascular bypass; 43 : Heart valve procedures; 52 : Aortic resection, replacement or anastomosis; 104 : Nephrectomy, partial or complete; 60 : Embolectomy and endarterectomy of lower limbs; 85 : Inguinal and femoral hernia repair; 124 : Hysterectomy, abdominal and vaginal; 167 : Mastectomy; 154 : Arthroplasty other than hip or knee; 74 : Gastrectomy, partial and total; 114 : Open prostatectomy; 119 : Oophorectomy, unilateral and bilateral; 10 : Thyroidectomy, partial or complete; 64 : Bone marrow transplant, 166 : Lumpectomy, quadrantectomy of breast; 105 : Kidney transplant; 176 : Other organ transplantation; ICD-9 94.26, 94.27 : Electroshock therapy |
| <b>(B) Discharge condition categories considered acute or complications of care</b>                                                                                                                                                                                                                                                                                                                                                                                                                                                                                                                                                                                                                                                                                                                                                                                                                                                                                                                                                                                                                                                                                                                                                                                                                                                                                                                  |
| 100 : Acute myocardial infarction; 237 : Complication of device; implant or graft; 106 : Cardiac dysrhythmias; 108 : Congestive heart failure, non-hypertensive; 105 : Conduction disorders; 146 : Diverticulosis and diverticulitis; 2 : Septicemia (except in labor); 238 : Complications of surgical procedures or medical care; 116 : Aortic and peripheral arterial embolism or thrombosis; (207, 225, 226, 227, 229, 230, 231, 232) : Fracture; 145 : Intestinal obstruction without hernia; 201 : Infective arthritis and osteomyelitis (except that caused by TB or sexually transmitted disease); 109 : Acute cerebrovascular disease; 97 : Peri-, endo-, and myocarditis; cardiomyopathy; 122 : Pneumonia (except that caused by TB or sexually transmitted disease); 245 : Syncope; 127 : Chronic obstructive pulmonary disease and bronchiectasis; 131 : Respiratory failure, insufficiency, arrest (adult); 55 : Fluid and electrolyte disorders; 159 : Urinary tract infections; 130 : Pleurisy, pneumothorax, pulmonary collapse; 157 : Acute and unspecified renal failure; 139 : Gastroduodenal ulcer (except hemorrhage); 153 : Gastrointestinal hemorrhage; 160 : Calculus of urinary tract; 112 : Transient cerebral ischemia                                                                                                                                                    |
| <b>(C) Condition categories for high risk discharge</b>                                                                                                                                                                                                                                                                                                                                                                                                                                                                                                                                                                                                                                                                                                                                                                                                                                                                                                                                                                                                                                                                                                                                                                                                                                                                                                                                              |
| 5 : HIV infection; 6 : Hepatitis; 56 : Cystic fibrosis; 57 : Immunity disorders; 61 : Sickle cell anemia; 190 : Fetal distress and abnormal forces of labor; 151 : Other liver diseases; 182 : Hemorrhage during pregnancy, abruptio placenta, placenta previa; 186 : Diabetes or abnormal glucose tolerance complicating pregnancy, childbirth, or the puerperium; 210 : Systemic lupus erythematosus and connective tissue disorders; 243 : Poisoning by nonmedicinal substances                                                                                                                                                                                                                                                                                                                                                                                                                                                                                                                                                                                                                                                                                                                                                                                                                                                                                                                   |

**Table S3.** Patient risk factor prevalence: percent (number) in years 2010 to 2013.

| <b>Risk factor</b>                            | <b>2010</b>        | <b>2011</b>        | <b>2012</b>        | <b>2013</b>        |
|-----------------------------------------------|--------------------|--------------------|--------------------|--------------------|
| <b>Age at hospitalization (years)</b>         |                    |                    |                    |                    |
| <25                                           | 1.71<br>(5,392)    | 1.56<br>(4,981)    | 1.49<br>(4,609)    | 1.49<br>(3,998)    |
| 25-45                                         | 14.68<br>(46,300)  | 14.04<br>(44,755)  | 14.11<br>(43,720)  | 14.23<br>(38,306)  |
| 45-60                                         | 27.42<br>(86,473)  | 26.59<br>(84,737)  | 26.95<br>(83,512)  | 27.05<br>(72,819)  |
| 60-75                                         | 34.99<br>(110,373) | 35.73<br>(113,885) | 35.75<br>(110,786) | 35.96<br>(96,792)  |
| >75                                           | 21.2<br>(66,880)   | 22.07<br>(70,350)  | 21.71<br>(67,270)  | 21.27<br>(57,262)  |
| <b>Sex: Female</b>                            | 48.18<br>(151,983) | 48.42<br>(154,319) | 48.37<br>(149,899) | 48.02<br>(129,270) |
| <b>BMI</b>                                    |                    |                    |                    |                    |
| Underweight                                   | 3.9<br>(12,314)    | 3.71<br>(11,812)   | 3.68<br>(11,395)   | 3.63<br>(9,783)    |
| Normal weight                                 | 29.9<br>(94,319)   | 29.16<br>(92,922)  | 28.46<br>(88,183)  | 28.26<br>(76,068)  |
| Overweight                                    | 28.2<br>(88,963)   | 28.04<br>(89,357)  | 27.96<br>(86,652)  | 27.82<br>(74,876)  |
| Obese                                         | 37.99<br>(119,822) | 39.1<br>(124,617)  | 39.91<br>(123,667) | 40.29<br>(108,450) |
| <b>Cause of ESRD: Diabetes</b>                | 36.64<br>(115,574) | 39.86<br>(127,038) | 41.56<br>(128,804) | 42.66<br>(114,823) |
| <b>Length of index hospitalization (days)</b> |                    |                    |                    |                    |
| <5                                            | 48.22<br>(152,101) | 47.61<br>(151,738) | 47.30<br>(146,594) | 47.07<br>(126,697) |
| 5                                             | 12.17<br>(38,380)  | 12.35<br>(39,361)  | 12.66<br>(39,223)  | 12.85<br>(34,586)  |
| 6                                             | 9.05<br>(28,539)   | 9.12<br>(29,060)   | 9.28<br>(28,760)   | 9.43<br>(25,387)   |
| >6                                            | 30.56<br>(96,398)  | 30.92<br>(98,549)  | 30.76<br>(95,320)  | 30.65<br>(82,507)  |
| <b>Time on ESRD (years)</b>                   |                    |                    |                    |                    |
| <1                                            | 23.13<br>(72,971)  | 25.87<br>(82,438)  | 24.75<br>(76,703)  | 23.69<br>(63,768)  |
| 1 to 2                                        | 15.86<br>(50,026)  | 15.54<br>(49,512)  | 15.04<br>(46,619)  | 14.76<br>(39,730)  |
| 2 to 3                                        | 12.63<br>(39,843)  | 12.39<br>(39,481)  | 12.49<br>(38,715)  | 12.22<br>(32,896)  |
| 3 to 6                                        | 25.46<br>(80,306)  | 24.75<br>(78,894)  | 24.53<br>(76,031)  | 24.81<br>(66,772)  |
| >6                                            | 22.91<br>(72,272)  | 21.46<br>(68,383)  | 23.18<br>(71,829)  | 24.52<br>(66,011)  |
| <b>High-risk index hospitalization</b>        | 1.16<br>(3,648)    | 1.06<br>(3,377)    | 1.05<br>(3,269)    | 1.1 (2,950)        |
| <b>Past-year comorbidities</b>                |                    |                    |                    |                    |
| Amputation status                             | 5.71<br>(18,007)   | 6.57<br>(20,928)   | 7.92<br>(24,553)   | 8.13<br>(21,877)   |
| Chronic obstructive pulmonary disease         | 23.3               | 24.03              | 25.46              | 25.54              |

|                                                                 |           |           |           |             |
|-----------------------------------------------------------------|-----------|-----------|-----------|-------------|
| (COPD)                                                          | (73,502)  | (76,601)  | (78,903)  | (68,737)    |
| Cardiorespiratory failure/shock                                 | 17.31     | 18.6      | 20.18     | 21.54       |
| Coagulation defects & other specified hematological disorders   | (54,613)  | (59,288)  | (62,528)  | (57,986)    |
| Drug and alcohol disorders                                      | 11.8      | 13.45     | 15.25     | 15.63       |
| End-stage liver disease                                         | (37,208)  | (42,857)  | (47,254)  | (42,068)    |
| Fibrosis of lung or other chronic lung disorders                | 4.03      | 4.4       | 5.07      | 5.17        |
| Hemiplegia/ paraplegia/ paralysis functional disability         | (12,723)  | (14,014)  | (15,708)  | (13,911)    |
| Hip fracture/dislocation                                        | 3.88      | 4.22      | 4.62      | 4.88        |
| Transplants                                                     | (12,252)  | (13,458)  | (14,328)  | (13,131)    |
| Metastatic cancer/acute leukemia                                | 3.05      | 2.79      | 2.8       | 2.69        |
| Severe hematological disorders                                  | (9,618)   | (8,883)   | (8,687)   | (7,245)     |
| Other infectious disease & pneumonias                           | 5.05      | 4.19      | 4.24      | 4.14        |
| Other cancers                                                   | (15,920)  | (13,352)  | (13,147)  | (11,147)    |
| Pancreatic disease                                              | 1.89      | 1.48      | 1.5       | 1.45        |
| Psychiatric comorbidity                                         | (5,951)   | (4,715)   | (4,662)   | (3,908)     |
| Respirator dependence/tracheostomy status                       | 2.26      | 1.9       | 2.01      | 2.1 (5,665) |
| Rheumatoid arthritis and inflammatory connective tissue disease | (7,139)   | (6,048)   | (6,223)   | 1.02        |
| Seizure disorders and convulsions                               | 1.18      | 1.04      | 1.07      | (2,750)     |
| Septicemia/shock                                                | 5.04      | 5.1       | 2.54      | 1.54        |
| Severe cancer                                                   | (15,891)  | (16,264)  | (7,863)   | (4,133)     |
| Severe infection                                                | 41.13     | 38.77     | 40.34     | 40.87       |
| Decubitus ulcer or chronic skin ulcer                           | (129,732) | (123,579) | (125,024) | (110,022)   |
|                                                                 | 7.27      | 5.32      | 6.17      | 6.15        |
|                                                                 | (22,939)  | (16,963)  | (19,119)  | (16,556)    |
|                                                                 | 5.86      | 5.07      | 5.24      | 5.41        |
|                                                                 | (18,476)  | (16,154)  | (16,239)  | (14,552)    |
|                                                                 | 21.47     | 24.03     | 28.42     | 29.12       |
|                                                                 | (67,730)  | (76,590)  | (88,076)  | (78,379)    |
|                                                                 | 0.71      | 0.77      | 0.83      | 0.83        |
|                                                                 | (2,240)   | (2,456)   | (2,581)   | (2,221)     |
|                                                                 | 5.51      | 5.4       | 5.7       | 5.73        |
|                                                                 | (17,364)  | (17,215)  | (17,674)  | (15,426)    |
|                                                                 | 8.55      | 8.3       | 8.93      | 8.98        |
|                                                                 | (26,982)  | (26,442)  | (27,664)  | (24,185)    |
|                                                                 | 17.37     | 16.67     | 16.61     | 16.57       |
|                                                                 | (54,799)  | (53,129)  | (51,468)  | (44,595)    |
|                                                                 | 3.07      | 2.75      | 2.84      | 2.85        |
|                                                                 | (9,691)   | (8,760)   | (8,792)   | (7,667)     |
|                                                                 | 5.46      | 5.1       | 5.16      | 5.08        |
|                                                                 | (17,225)  | (16,264)  | (16,003)  | (13,662)    |
|                                                                 | 14.03     | 12.26     | 13.16     | 12.92       |
|                                                                 | (44,266)  | (39,066)  | (40,778)  | (34,768)    |

**Table S4.** Number of patients, dialysis facilities, discharging hospitals, and readmission characteristics for each year (2010-2013).

| Characteristics            | 2010    | 2011    | 2012    | 2013*   |
|----------------------------|---------|---------|---------|---------|
| Patients                   | 146,295 | 146,804 | 148,128 | 135,795 |
| Dialysis facilities        | 5,346   | 5,579   | 5,637   | 5,628   |
| Hospitals                  | 5,223   | 4,433   | 4,388   | 4,254   |
| Index discharges           | 315,418 | 318,708 | 309,897 | 269,177 |
| Readmissions               | 93,668  | 94,226  | 90,670  | 76,338  |
| Unplanned readmission rate | 29.7%   | 29.6%   | 29.3%   | 28.4%   |

\* For the year 2013, only the first 11 months (January 1-November 30) of data for index discharges were used to allow for a 30-day follow up period needed to assess 30-day readmissions; thus, accounting for the smaller overall numbers of patients and discharges in the 2013 cohort.

Table S5. Flagging of dialysis facilities with significantly worse or non-significant risk-adjusted standardized readmission ratio (SRR) for random effects (RE) model and fixed effects models 1 and 2 (FE1, FE2) for the 2010 cohort. Highlighted are the number of facilities ( $N_F$ ) flagged as significantly worse or better by at least two models and with  $N_F = 5,043$  facilities flagged as non-significant by all 3 models.

| <b>RE</b>           | <b>Models</b>       |                     | <b>Num.<br/>Facilities</b> | <b>Percent</b> |
|---------------------|---------------------|---------------------|----------------------------|----------------|
|                     | <b>FE1</b>          | <b>FE2</b>          |                            |                |
| Non-significant     | Non-significant     | Non-significant     | $N_F = 5043$               | 94.33%         |
| Non-significant     | Non-significant     | Significantly worse | 7                          | 0.13%          |
| Non-significant     | Significantly worse | Non-significant     | 4                          | 0.07%          |
| Non-significant     | Significantly worse | Significantly worse | 34                         | 0.64%          |
| Significantly worse | Non-significant     | Non-significant     | 68                         | 1.27%          |
| Significantly worse | Non-significant     | Significantly worse | 14                         | 0.26%          |
| Significantly worse | Significantly worse | Non-significant     | 20                         | 0.37%          |
| Significantly worse | Significantly worse | Significantly worse | 75                         | 1.40%          |
|                     |                     |                     | Total $N_F = 222$          |                |

**Suppl. Fig 1.** Construction of annual (year 2010-2013) study cohorts (number of patients) and inclusion/exclusion for 30-day readmission profiling analysis.

**Suppl. Fig 2.** Trends in adjusted odds ratio and 95% confidence intervals (length of horizontal lines) for patient risk factors in year 2011 (from model FE2): (A) past-year morbidities and (B) demographic variables, diabetes as the cause of ESRD, years on ESRD, high risk index discharge, and length of index hospitalization.

**Suppl. Fig 3.** Covariate balance between facilities with significantly worse readmission and facilities with non-significant readmission before and after matching for the 2010 cohort.

**Suppl. Fig 4.** Comparison of patient staffing characteristics in dialysis facilities with significantly better (SB) readmission vs. facilities with non-significant (NS) readmission in the years 2010-2013 (N = number of facilities).

Suppl. Fig.1

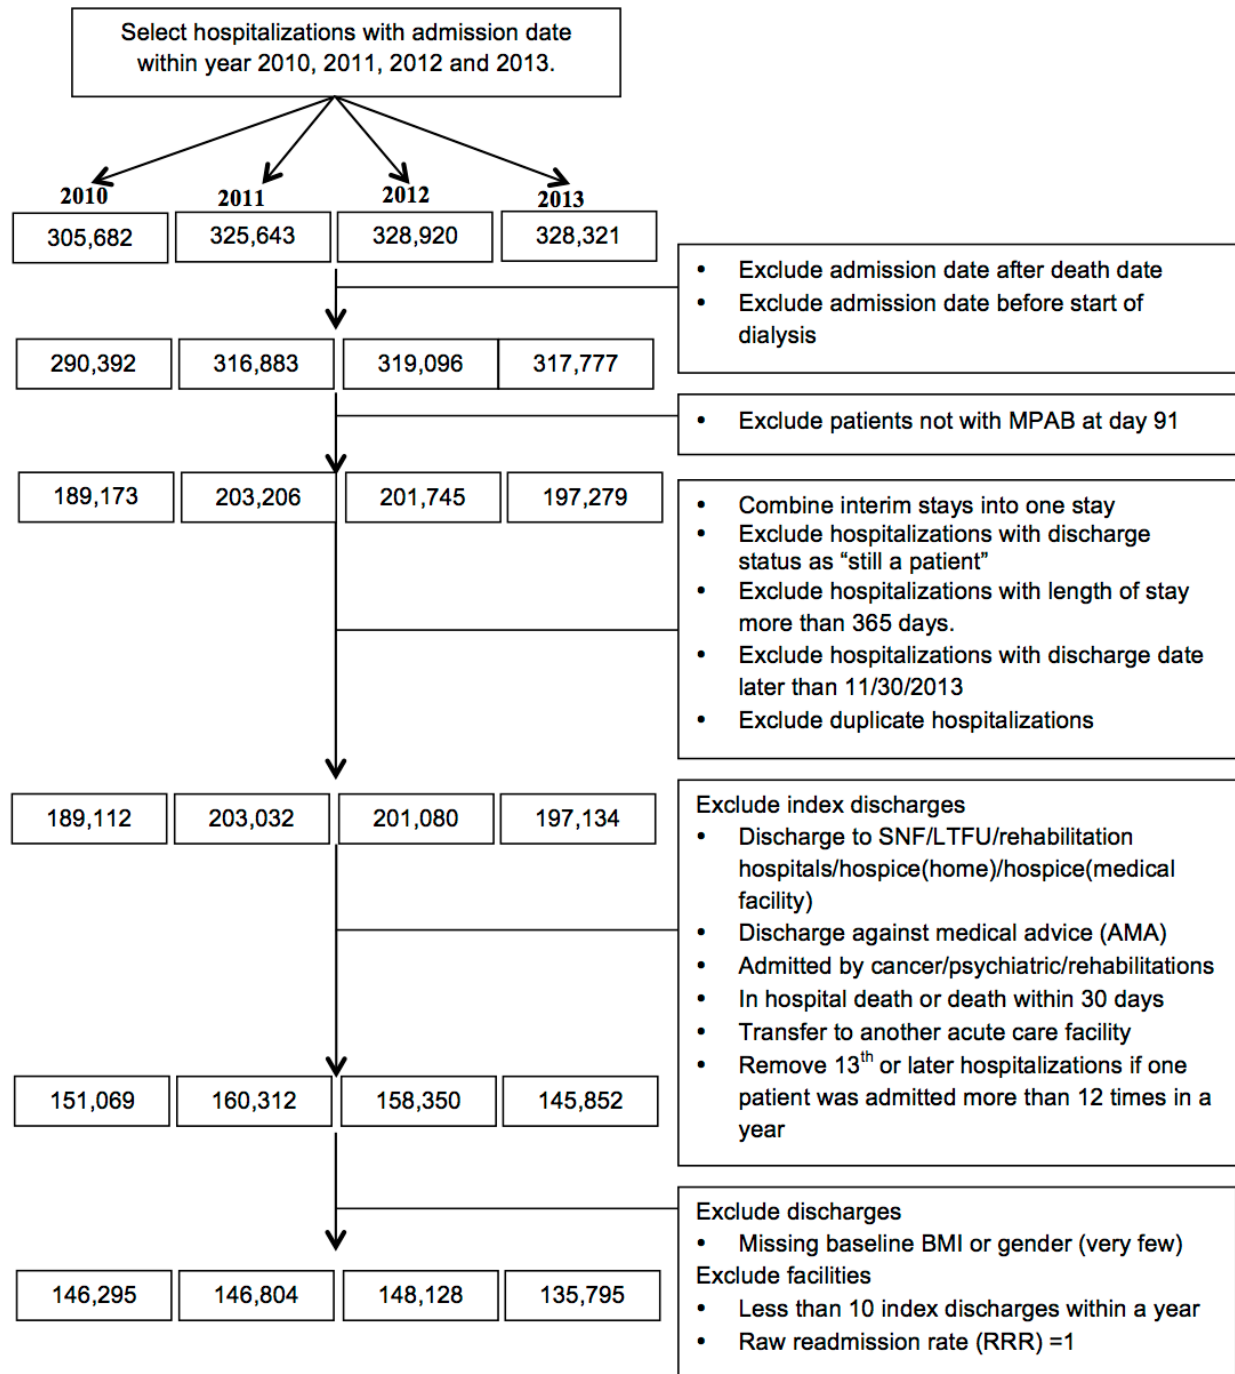

Suppl. Fig.2A

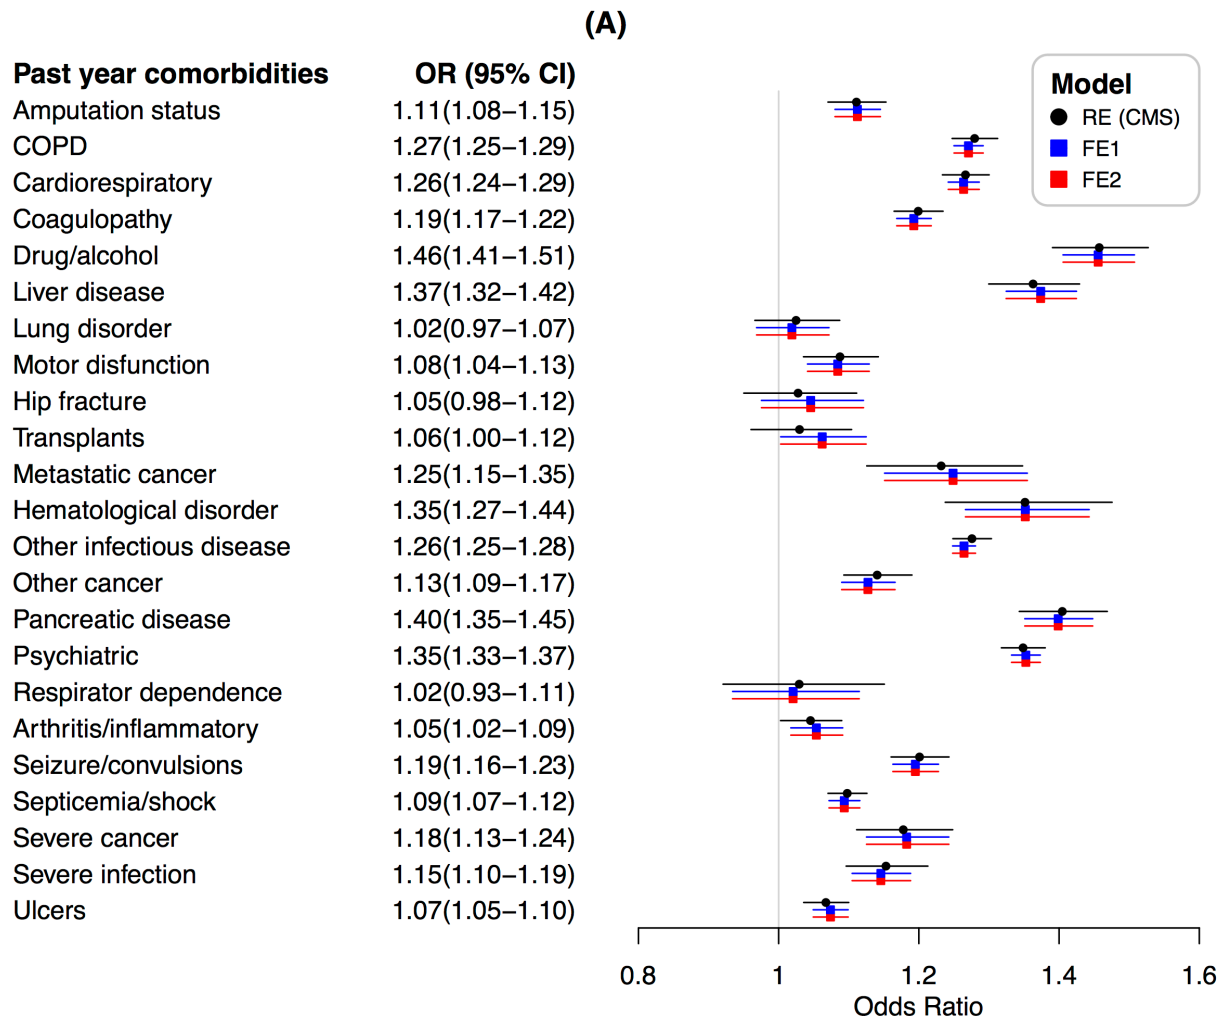

Suppl. Fig.2B

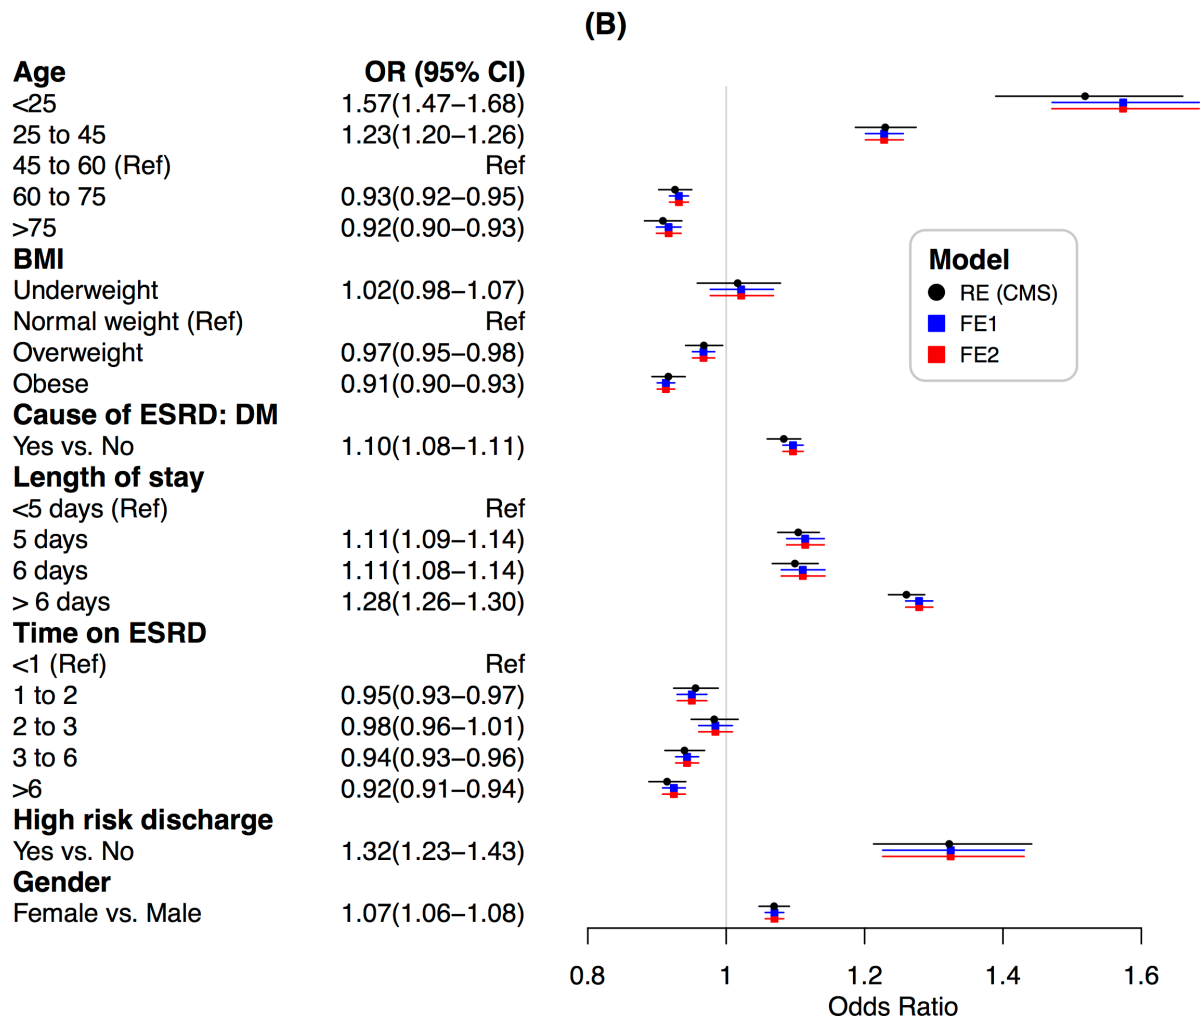

**Suppl. Fig.3**

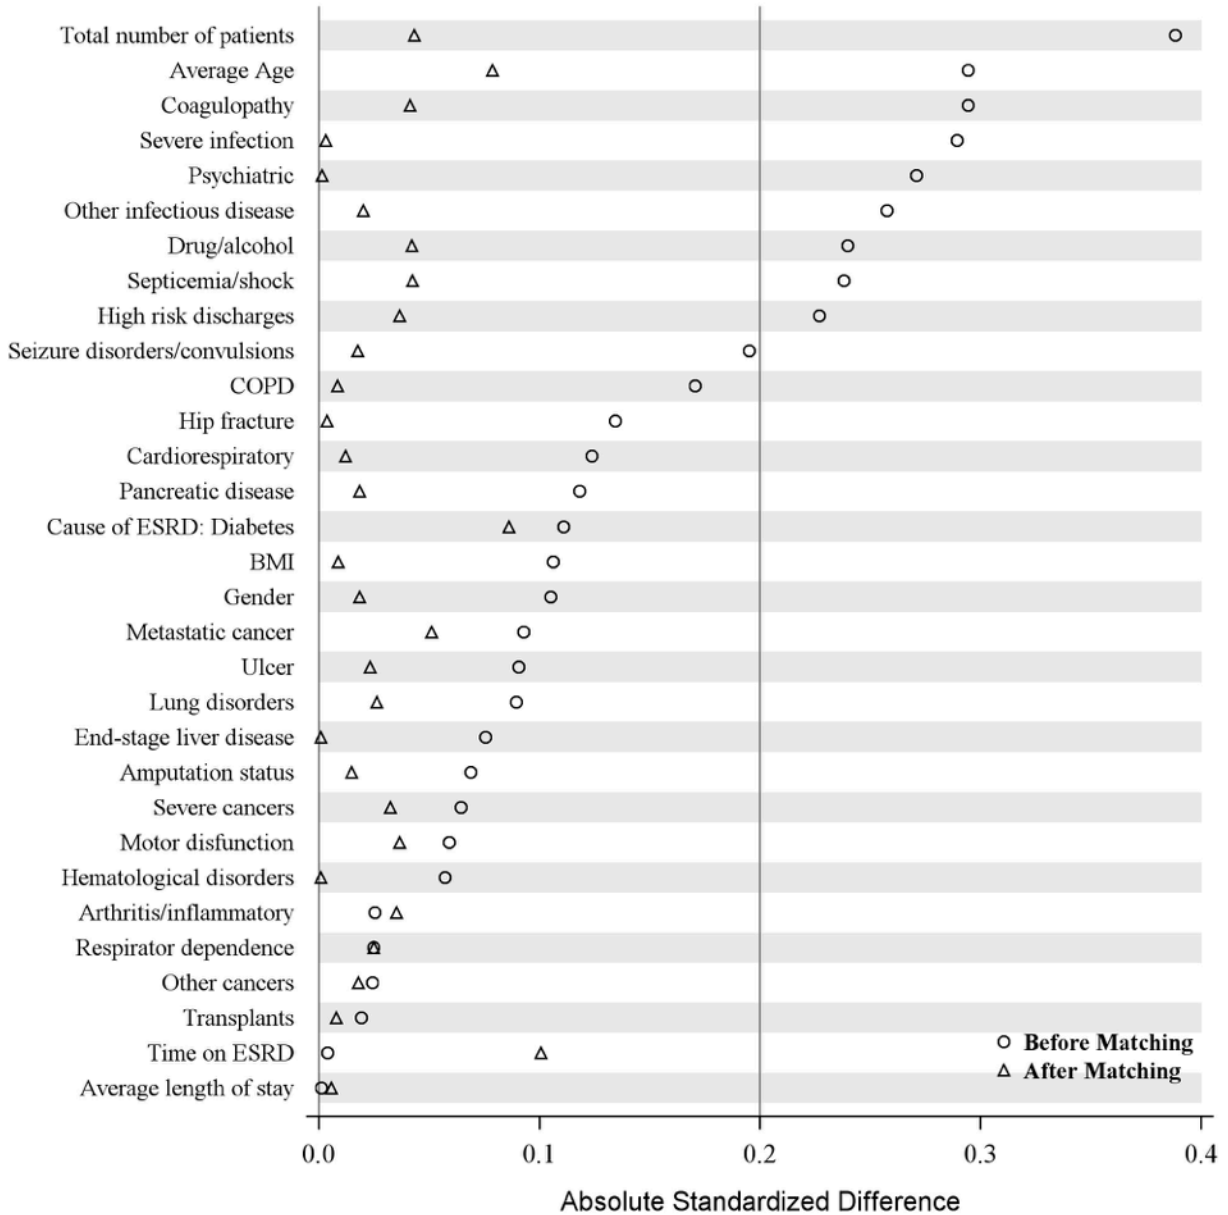

Suppl. Fig.4

**(A) Percent nurse-to-total staff**

| Year | N (SB Fac.) | N (NS Fac.) | Estimate | P-value |
|------|-------------|-------------|----------|---------|
| 2010 | 67          | 334         | 0.23     | 0.918   |
| 2011 | 72          | 360         | -2.886   | 0.162   |
| 2012 | 64          | 320         | -0.186   | 0.936   |
| 2013 | 68          | 340         | -0.544   | 0.795   |

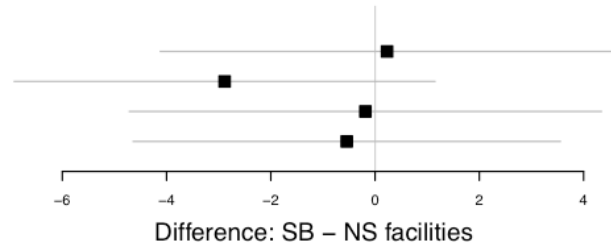

**(B) Patient-to-nurse ratio**

| Year | N (SB Fac.) | N (NS Fac.) | Estimate | P-value |
|------|-------------|-------------|----------|---------|
| 2010 | 67          | 334         | 0.186    | 0.824   |
| 2011 | 72          | 360         | 0.44     | 0.583   |
| 2012 | 64          | 320         | 1.002    | 0.181   |
| 2013 | 68          | 340         | -0.544   | 0.506   |

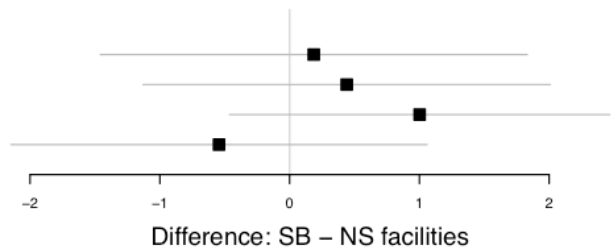

**(C) Patient-to-RN ratio**

| Year | N (SB Fac.) | N (NS Fac.) | Estimate | P-value |
|------|-------------|-------------|----------|---------|
| 2010 | 67          | 334         | 2.111    | 0.247   |
| 2011 | 72          | 360         | 0.563    | 0.594   |
| 2012 | 64          | 320         | 0.665    | 0.454   |
| 2013 | 68          | 340         | -0.643   | 0.475   |

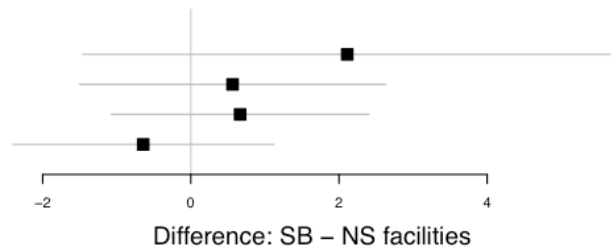

**(D) Patient-to-total staff ratio**

| Year | N (SB Fac.) | N (NS Fac.) | Estimate | P-value |
|------|-------------|-------------|----------|---------|
| 2010 | 67          | 334         | -0.272   | 0.206   |
| 2011 | 72          | 360         | 0.116    | 0.547   |
| 2012 | 64          | 320         | 0.083    | 0.659   |
| 2013 | 68          | 340         | -0.178   | 0.37    |

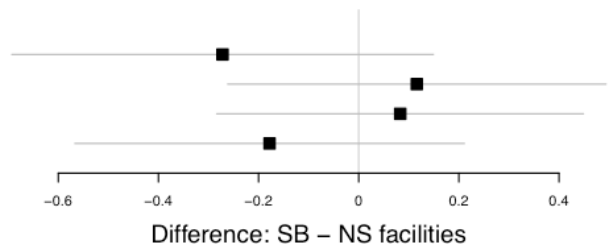

Supplement: Supplementary file 1 [file 14312570]
